# Supplementary material for: Distribution Characteristics, Antimicrobial Resistance, and Variation Trends of Biliary Microbiome in Acute Cholangitis patients : A 7-Year Retrospective Study in a Tertiary Hospital in Northwest China
Source: Research Square preprint supplement (doi:10.21203/rs.3.rs-4162226/v1), 2024-04-01
Supplement: Supplementary file 1 [file a3c40efc9f0e4af028d50391.docx]

**Table2**  **Distribution of pathogenic bacterial genera in positive bile cultures**

| **genera** | **species** | **strains** | **genera** | **species** | **strains** | **genera** | **species** | **strains** | **genera** | **species** | **strains** | **genera** | **species** | **strains** |
| --- | --- | --- | --- | --- | --- | --- | --- | --- | --- | --- | --- | --- | --- | --- |
| Escherichia | Escherichia coli | 249 | Acinetobacter | Acinetobacter baumannii | 29 | Burkholderia | Burkholderia cepacia | 1 | Staphylococcus | Staphylococcus epidermidis | 26 | Streptococcus | Streptococcus salivarius | 9 |
| Klebsiella | Klebsiella pneumoniae | 135 |  | Acinetobacter johnsonii | 1 | Enterococcus | Enterococcus faecium | 122 |  | Staphylococcus hominis | 19 |  | Streptococcus oralis | 7 |
|  | Klebsiella oxytoca | 33 | Aeromonas | Aeromonas hydrophila | 8 |  | Enterococcus faecalis | 52 |  | Staphylococcus aureus | 15 |  | Streptococcus anginosus | 7 |
| Enterobacter | Enterobacter cloacae | 62 |  | Aeromonas caviae | 7 |  | Enterococcus avium | 10 |  | Staphylococcus haemolyticus | 4 |  | Streptococcus mitis | 5 |
|  | Enterobacter asburiae | 12 | Xanthomonas | Stenotrophomonas maltophilia | 11 |  | Enterococcus casselifavus | 7 |  | Staphylococcus cohnii | 2 |  | Streptococcus intermadius | 2 |
|  | Enterobacter aerogenes | 6 | Serratia | Serratia marcescens | 6 |  | Streptococcus intermadius | 2 |  | Staphylococcus warneri | 2 |  | Streptococcus  pneumoniae | 2 |
|  | Enterobacter gergoviae | 1 |  | Serratia odorifera | 1 |  | Enterococcus gallinarum | 2 |  | Staphylococcus sciuri | 1 |  | Streptococcus bovis | 2 |
| Pseudomonas | Pseudomonas aeruginosa | 35 |  | Serratia fonticola | 1 |  | Enterococcus hirae | 1 |  | Staphylococcus raffinosus | 1 |  | Streptococcus | 1 |
|  |
| constellatus |
|  | Pseudomonas monteilii | 1 |  | Serratia plymuthica | 1 |  | Enterococcus durans | 1 |  | Staphylococcus | 1 |  | Streptococcus | 1 |
|  |  |
| caprae | sanguis |
|  | Pseudomonas alcaligenes | 1 | Morganella | Morganella morganii | 5 | Bacillus | Bacillus cereus | 1 |  | Staphylococcus | 1 | Candida | Candida | 27 |
|  |  |
| xylosus | albicans |
|  | Pseudomonas fluorescens | 1 | Proteus | Proteus mirabilis | 2 |  | Bacillus thuringiensis | 1 | leuconostoc | leuconostoc lactis | 1 |  | Candida glabrata | 6 |
|  | Pseudomonas stutzeri | 1 |  | Proteus vulgaris | 2 |  | Bacillus licheniformis | 1 |  | leuconostoc | 1 |  | Candida tropicalis | 5 |
|  |
| mesenteroides |
| Citrobacter | Citrobacter freundii | 26 | Raoultella | Raoulia ornitholytica | 4 | micrococcus | Streptococcus anginosus | 3 | lactobacillus | lactobacillus fermentum | 1 |  | Candida krusei | 3 |
|  | Citrobacter braakii | 9 | Providencia | Providencia rettgeri | 1 | Corynebacterium | Corynebacterium striatum | 2 |  | lactobacillus | 1 |  | Candida parapsilosis | 2 |
|  |
| rhamnosus |
|  | Citrobacter amalonaticus | 2 | Shewanella | Shewanella putrefaciens | 1 |  |  |  |  |  |  |  |  |  |
