# Supplementary material for: Distribution Characteristics, Antimicrobial Resistance, and Variation Trends of Biliary Microbiome in Acute Cholangitis patients : A 7-Year Retrospective Study in a Tertiary Hospital in Northwest China
Source: Research Square preprint supplement (doi:10.21203/rs.3.rs-4162226/v1), 2024-04-01
Supplement: Supplementary file 2 [file c981409ca10a576d7adecbce.docx]

**Table 3 Antimicrobial susceptibilities of Escherichia coli and Klebsiella pneumoniae**

**isolated from bile cultures**

| year | Escherichia coli | | | | | | | | Klebsiella pneumoniae | | | | | | | |
| --- | --- | --- | --- | --- | --- | --- | --- | --- | --- | --- | --- | --- | --- | --- | --- | --- |
| third-generation cephalosporins | | fourth-generation cephalosporins | | β-lactamase inhibitors | | Carbapenems | | third-generation cephalosporins | | fourth-generation cephalosporins | | β-lactamase inhibitors | | Carbapenems | |
| ceftriaxone | cefuroxime | ceftazidime | cefepime | cefoperazone/sulbactam | piperacillin/sulbactam | imipenem | meropenem | ceftriaxone | cefuroxime | ceftazidime | cefepime | cefoperazone  /sulbactam | piperacillin/sulbactam | imipenem | meropenem |
| 2017 | 60.87 | 60.87 | 73.91 | 69.57 | 86.96 | 86.96 | 100 | 100 | 80 | 60 | 100 | 100 | 100 | 100 | 100 | 100 |
| 2018 | 52.94 | 50 | 73.53 | 73.53 | 85.29 | 91.18 | 100 | 100 | 84.62 | 76.92 | 92.31 | 84.62 | 92.31 | 84.62 | 92.31 | 92.31 |
| 2019 | 19.35 | 16.13 | 41.94 | 51.61 | 93.55 | 87.1 | 100 | 100 | 57.14 | 61.9 | 66.67 | 71.43 | 76.19 | 90.48 | 95.24 | 95.24 |
| 2020 | 55.56 | 41.67 | 55.56 | 55.56 | 75 | 97.22 | 100 | 100 | 76.67 | 63.33 | 76.67 | 76.67 | 86.67 | 86.67 | 90 | 90 |
| 2021 | 47.37 | 38.6 | 56.14 | 52.63 | 82.46 | 92.98 | 100 | 100 | 71.88 | 65.63 | 81.25 | 75 | 87.5 | 90.63 | 96.88 | 96.88 |
| 2022 | 85.71 | 38.09 | 66.67 | 61.9 | 95.24 | 90.48 | 100 | 100 | 69.23 | 53.85 | 61.54 | 61.54 | 69.23 | 76.92 | 92.31 | 92.31 |
| 2023 | not measured | 37.25 | 45.1 | 37.25 | 62.75 | 80.39 | 92.16 | 92.16 | not measured | 53.85 | 84.62 | 76.92 | 76.92 | 76.92 | 84.62 | 84.62 |
| Total susceptibilities | 49.01 | 39.53 | 56.92 | 54.94 | 80.63 | 89.33 | 98.39 | 98.39 | 71.05 | 62.99 | 77.95 | 75.59 | 83.46 | 86.61 | 92.24 | 92.24 |
